# Supplementary material
Source: Springer Nature journal article supplement (https://www.springermedizin.de/resource/supplementary/12943_2010_831_MOESM8_ESM.pdf/9554936)

A.

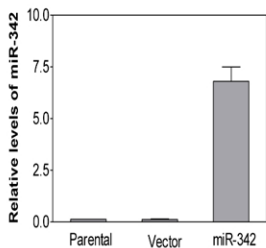

B.

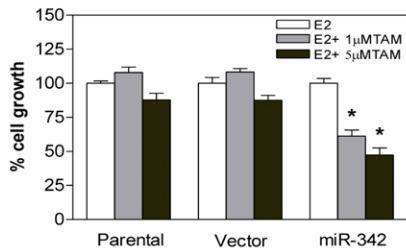

C.

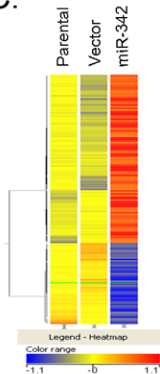

D.

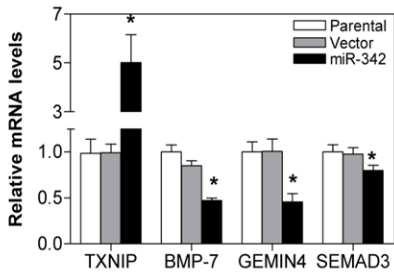

E.

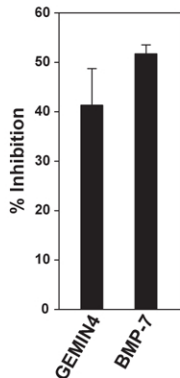

Supplement: MOESM8 [file 9554936]
